# Supplementary material for: Social stress increases expression of hemoglobin genes in mouse prefrontal cortex
Source: PubMed Central journal article supplement (PMC4269175; doi:10.1186/s12868-014-0130-6), 2014-12-04
Supplement: 12868_2014_130_MOESM2_ESM.pdf [file 12868_2014_130_MOESM2_ESM.pdf]

**Correlation between data (acute stress)**

|                | Thymus                       |                             |                       | Spleen                        |                             |                              | Arenal gland          |                       |                       | Agxt211              |                       |                       |
|----------------|------------------------------|-----------------------------|-----------------------|-------------------------------|-----------------------------|------------------------------|-----------------------|-----------------------|-----------------------|----------------------|-----------------------|-----------------------|
|                | All animals                  | Control group               | Stress group          | All animals                   | Control group               | Stress group                 | All animals           | Control group         | Stress group          | All animals          | Control group         | Stress group          |
| Thymus         | -----                        |                             |                       | -----                         |                             |                              | -----                 |                       |                       | -----                |                       |                       |
| Spleen         | r = 0.11<br>p = 0.60         | r = 0.60<br>p = <b>0.04</b> | r = -0.21<br>p = 0.51 | -----                         |                             |                              | -----                 |                       |                       | -----                |                       |                       |
| Adrenal gland  | r = 0.27<br>p = 0.20         | r = 0.30<br>p = 0.35        | r = 0.05<br>p = 0.88  | r = 0.26<br>p = 0.22          | r = 0.47<br>p = 0.12        | r = 0.31<br>p = 0.32         | -----                 |                       |                       | -----                |                       |                       |
| <i>Agxt211</i> | r = -0.46<br>p = <b>0.03</b> | r = -0.10<br>p = 0.76       | r = -0.20<br>p = 0.53 | r = -0.07<br>p = 0.76         | r = -0.38<br>p = 0.25       | r = -0.10<br>p = 0.75        | r = -0.38<br>p = 0.08 | r = -0.58<br>p = 0.06 | r = -0.17<br>p = 0.59 | -----                |                       |                       |
| <i>Fam107a</i> | r = -0.31<br>p = 0.16        | r = 0.31<br>p = 0.36        | r = -0.17<br>p = 0.59 | r = 0.68<br>p = <b>0.0004</b> | r = 0.66<br>p = <b>0.03</b> | r = 0.77<br>p = <b>0.003</b> | r = -0.09<br>p = 0.69 | r = 0.01<br>p = 0.98  | r = 0.10<br>p = 0.75  | r = 0.21<br>p = 0.33 | r = -0.17<br>p = 0.61 | r = -0.06<br>p = 0.85 |

**Correlation between data (13 days of stress)**

|                      | Thymus                        |                       |                       | Spleen                      |                       |                      | Arenal gland          |                       |                             |
|----------------------|-------------------------------|-----------------------|-----------------------|-----------------------------|-----------------------|----------------------|-----------------------|-----------------------|-----------------------------|
|                      | All animals                   | Control group         | Stress group          | All animals                 | Control group         | Stress group         | All animals           | Control group         | Stress group                |
| Thymus               | -----                         |                       |                       | -----                       |                       |                      | -----                 |                       |                             |
| Spleen               | r = -0.07<br>p = 0.73         | r = 0.24<br>p = 0.46  | r = 0.35<br>p = 0.27  | -----                       |                       |                      | -----                 |                       |                             |
| Adrenal gland        | r = -0.34<br>p = 0.11         | r = -0.05<br>p = 0.89 | r = -0.26<br>p = 0.42 | r = 0.20<br>p = 0.34        | r = 0.10<br>p = 0.76  | r = 0.14<br>p = 0.66 | -----                 |                       |                             |
| <i>Hbb-b1</i>        | r = -0.58<br>p = <b>0.004</b> | r = -0.13<br>p = 0.70 | r = 0.14<br>p = 0.66  | r = 0.50<br>p = <b>0.02</b> | r = 0.04<br>p = 0.92  | r = 0.33<br>p = 0.30 | r = 0.11<br>p = 0.60  | r = -0.19<br>p = 0.57 | r = -0.08<br>p = 0.81       |
| <i>1500015O10Rik</i> | r = -0.19<br>p = 0.38         | r = 0.28<br>p = 0.41  | r = 0.30<br>p = 0.35  | r = 0.13<br>p = 0.55        | r = -0.43<br>p = 0.19 | r = 0.08<br>p = 0.81 | r = -0.07<br>p = 0.76 | r = -0.49<br>p = 0.13 | r = -0.14<br>p = 0.66       |
| <i>Mgp</i>           | r = -0.43<br>p = <b>0.04</b>  | r = 0.41<br>p = 0.21  | r = -0.31<br>p = 0.33 | r = 0.19<br>p = 0.38        | r = -0.55<br>p = 0.08 | r = 0.25<br>p = 0.43 | r = 0.32<br>p = 0.14  | r = -0.50<br>p = 0.12 | r = 0.68<br>p = <b>0.01</b> |

|                      | <i>Hbb-b1</i>                 |                      |                      | <i>1500015O10Rik</i>         |                              |                      |
|----------------------|-------------------------------|----------------------|----------------------|------------------------------|------------------------------|----------------------|
|                      | All animals                   | Control group        | Stress group         | All animals                  | Control group                | Stress group         |
| <i>Hbb-b1</i>        | -----                         |                      |                      | -----                        |                              |                      |
| <i>1500015O10Rik</i> | r = 0.59<br>p = <b>0.003</b>  | r = 0.16<br>p = 0.63 | r = 0.36<br>p = 0.26 | -----                        |                              |                      |
| <i>Mgp</i>           | r = 0.67<br>p = <b>0.0005</b> | r = 0.01<br>p = 0.96 | r = 0.38<br>p = 0.23 | r = 0.70<br>p = <b>0.000</b> | r = 0.89<br>p = <b>0.000</b> | r = 0.36<br>p = 0.25 |
